# Supplementary material for: Development of a DNA Barcoding-Like Approach to Detect Mustard Allergens in Wheat Flours
Source: PubMed Central journal article supplement (PMC6470546; doi:10.3390/genes10030234), 2019-03-19
Supplement: genes-10-00234-s001.pdf [file genes-10-00234-s001.pdf]

Supplementary Materials

**Table S1:** List of the analysed samples with details concerning the geographical origins, the CGN accession numbers, the GenBank Accession Number and the specimen voucher.

| Taxa                   | Origin      | CGN_Accession number | GenBank Accession Number                                  | Specimen voucher |
|------------------------|-------------|----------------------|-----------------------------------------------------------|------------------|
| <i>Brassica nigra</i>  | Germany     | CGN06624             | LR217828 ( <i>matK</i> ); LR217834 (B)                    | Bni_01           |
|                        | Greek       | CGN06619             | LR217829 ( <i>matK</i> ); LR217835 (B)                    | Bni_02           |
|                        | Germany     | CGN06620             | LR217830 ( <i>matK</i> ); LR217836 (B)                    | Bni_03           |
| <i>Brassica juncea</i> | Germany     | CGN06616             | LR217822 ( <i>matK</i> ); LR217843 (A6);<br>LR217837 (B)  | Bju_01           |
|                        | Sweden      | CGN12009             | LR217823 ( <i>matK</i> ); LR217844 (A6),<br>LR217838 (B)  | Bju_02           |
|                        | Germany     | CGN06615             | LR217824 ( <i>matK</i> ); LR217845 (A6);<br>LR217839 (B)  | Bju_03           |
| <i>Brassica napus</i>  | Netherlands | CGN13917             | LR217825 ( <i>matK</i> ); LR217846 (A6);<br>LR217840 (C1) | Bna_01           |
|                        | France      | CGN14113             | LR217826 ( <i>matK</i> ); LR217847 (A6);<br>LR217841 (C1) | Bna_02           |
|                        | Germany     | CGN12014             | LR217827 ( <i>matK</i> ); LR217848 (A6);<br>LR217842 (C1) | Bna_03           |
| <i>Sinapis alba</i>    | Italy       | CGN11981             | LR217831 ( <i>matK</i> ); LR217819 (ITS2)                 | Sal_01           |
|                        | Sweden      | CGN06662             | LR217832 ( <i>matK</i> ); LR217820 (ITS2)                 | Sal_02           |
|                        | Germany     | CGN11969             | LR217833 ( <i>matK</i> ); LR217821 (ITS2)                 | Sal_03           |

**Table S2.** Percentages of the average Kimura two-parameter (K2) distance, range of K2P distances, standard error (SE), and range for each tested marker. Overall mean distances and intraspecific and interspecific comparisons are indicated.

| Locus            | Intraspecific comparison |           | Interspecific comparison |           |
|------------------|--------------------------|-----------|--------------------------|-----------|
|                  | Mean % variation (SE%)   | Range (%) | Mean % variation (SE%)   | Range (%) |
| <i>rbcL</i>      | 0.75 (0.1)               | 0-3.0     | 1.05 (0.29)              | 0-1.8     |
| <i>matK</i>      | 0 (0)                    | 0         | 1.01 (0.28)              | 0.2-1.5   |
| <i>psbA-trnH</i> | 4.6 (1.66)               | 1.0-8.0   | 17.67 (2.98)             | 7.0-25.0  |
| <i>ITS2</i>      | 1.5 (0.75)               | 0-3.0     | 3.95 (0.31)              | 3.25-5.4  |

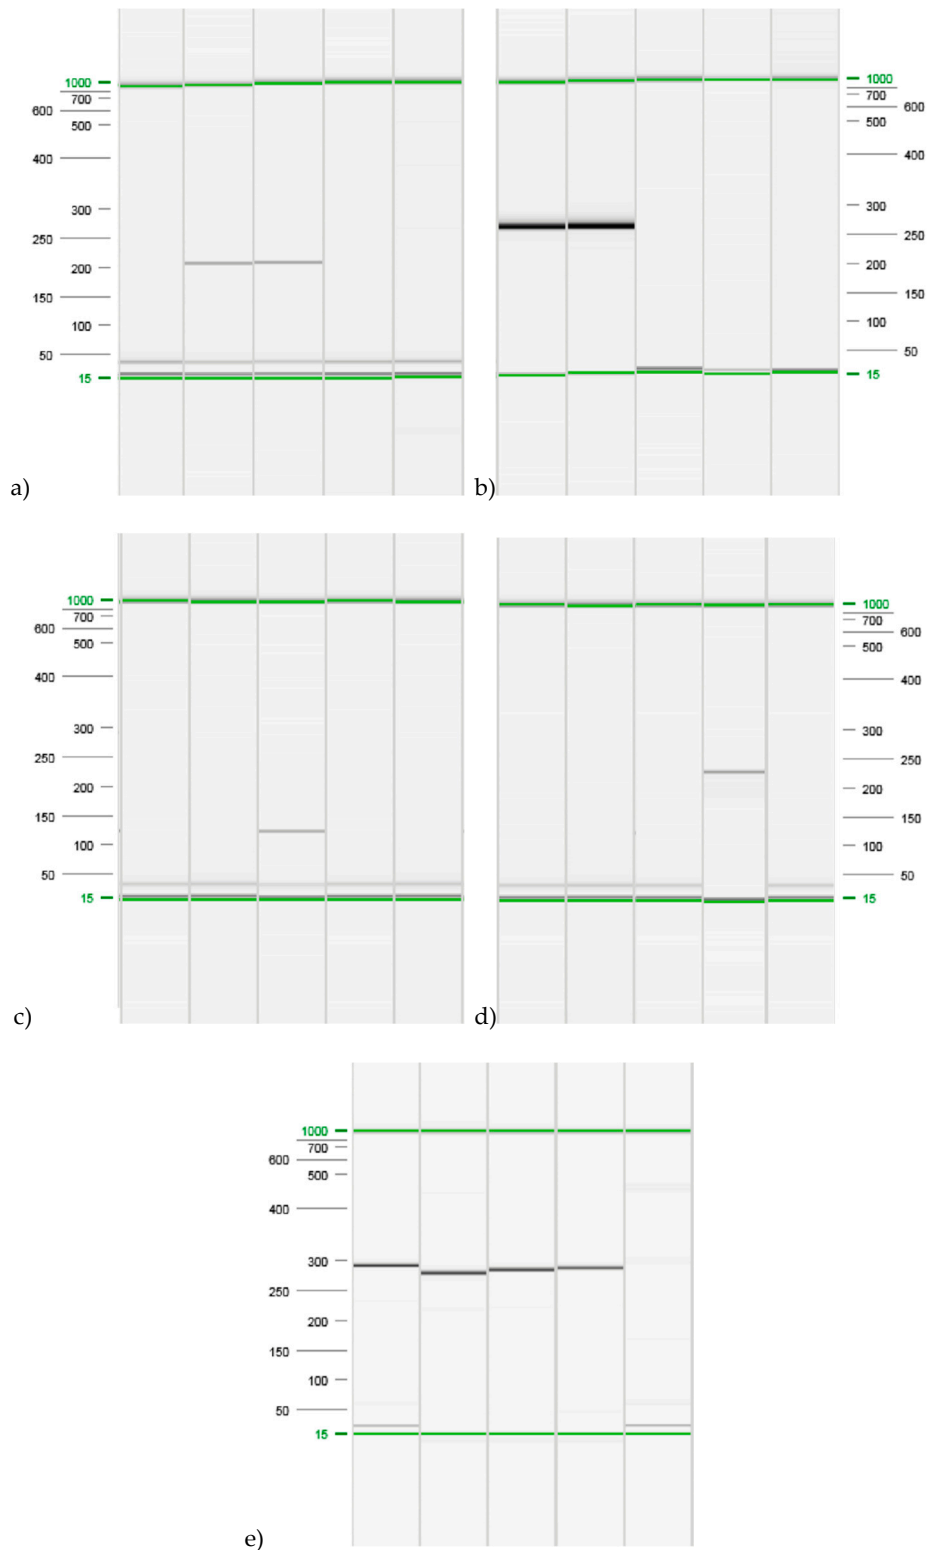

**Figure S1:** Amplification products obtained by the set of primers considered in this work. a) Primer A6: Lane 1: *Brassica nigra*, lane 2: *Brassica juncea*, lane 3: *Brassica napus*, lane 4: *Sinapis alba*, lane 4: Negative control; b) Primer B: Lane 1: *Brassica nigra*, lane 2: *Brassica juncea*, lane 3: *Brassica napus*, lane 4: *Sinapis alba*, lane 4: Negative control; c) Primer C1 : Lane 1: *Brassica nigra*, lane 2: *Brassica juncea*, lane 3: *Brassica napus*, lane 4: *Sinapis alba*, lane 4: Negative control; d) Primer S.alba ITS2: : Lane 1: *Brassica nigra*, lane 2: *Brassica juncea*, lane 3: *Brassica napus*, lane 4: *Sinapis alba*, lane 4: Negative control; e) Primer Bras\_matK: : Lane 1: *Brassica nigra*, lane 2: *Brassica juncea*, lane 3: *Brassica napus*, lane 4: *Sinapis alba*, lane 4: Negative control.
